# Supplementary material for: Ultrahigh energy storage capability of trilayered polyetherimide/poly(vinylidenefluoride-trifluoroethylene-chlorofluoroethylene) with low loading of boron nitride nanosheets
Source: Royal Society of Chemistry journal article supplement (doi:10.1039/d2tc02556f), 2022-01-01
Supplement: d2tc02556f1.pdf [file d2tc02556f1.pdf]

## Supplemental Information

### Ultrahigh energy storage capability of trilayer polyetherimide/poly(vinylidene fluoride-trifluoroethylene- chlorofluoroethylene) with low loading of boron nitride nanosheets

Huijian Ye, Huilei Jiang, Lixin Xu\*

College of Materials Science and Engineering, Zhejiang University of Technology,  
Hangzhou 310014, China

\* Corresponding author, E-mail: [gcsxlx@zjut.edu.cn](mailto:gcsxlx@zjut.edu.cn) (L. Xu)

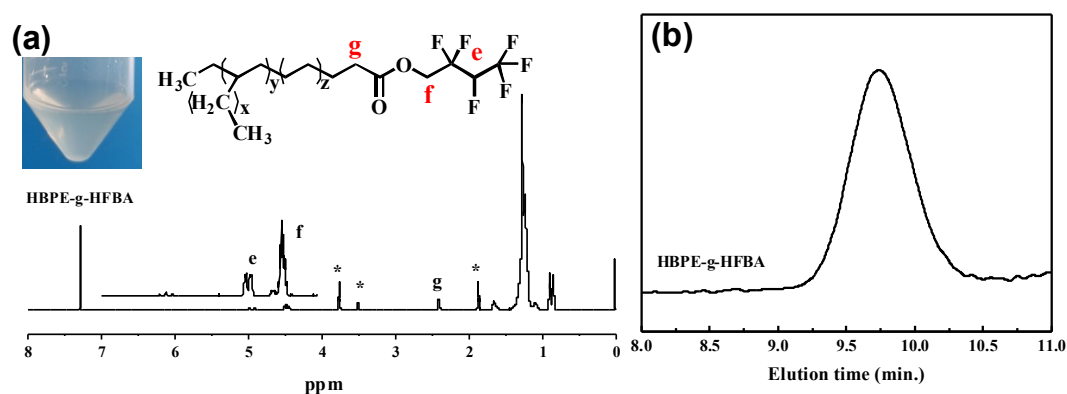

**Figure S1.** The structural characterizations of HBPE-g-HFBA copolymer: (a) <sup>1</sup>H NMR spectra, and (b) GPC trace.

**Table S1.** The grafting characterizations and GPC results of HBPE-g-HFBA

| Sample      | Volume<br>(mL) | Yields<br>(g) | HFBA<br>grafting <sup>a</sup><br>(mol%) | Branching<br>degree <sup>b</sup><br>(/1000C) | GPC <sup>c</sup>      |                       |     |
|-------------|----------------|---------------|-----------------------------------------|----------------------------------------------|-----------------------|-----------------------|-----|
|             |                |               |                                         |                                              | $\bar{M}_{n,PS}$ (kD) | $\bar{M}_{w,PS}$ (kD) | PDI |
| HBPE-g-HFBA | 20             | 3.88          | 4.3                                     | 84.2                                         | 27.8                  | 33.4                  | 1.2 |

a: HFBA grafting obtained via <sup>1</sup>H NMR spectroscopy based on end-group analysis.

b: Degree of branching determined via <sup>1</sup>H NMR spectroscopy.

c: Number-averaged molecular weight ( $M_n$ ), weight-averaged molecular weight ( $M_w$ )

and polydispersibility index (PDI) determined via GPC with polystyrene (PS) standards.

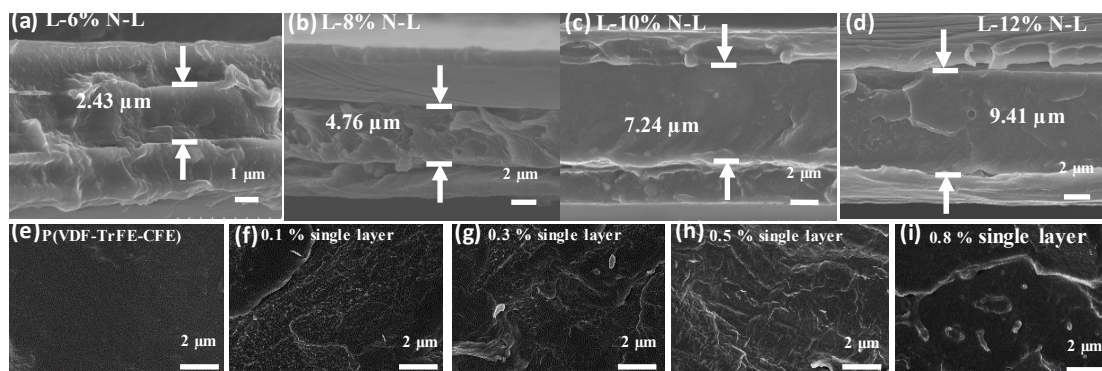

**Figure S2.** Cross-sectional SEM morphology of trilayer all-polymer LNL composite and BNNs/P(VDF-TrFE-CFE) nanocomposite.

**Table S2.** Layer thickness and volume fraction of trilayer all-polymer LNL composites with different P(VDF-TrFE-CFE) loadings

|          | Concentration (wt%) | P(VDF-TrFE-CFE) thickness ( $\mu\text{m}$ ) | PEI thickness ( $\mu\text{m}$ ) | P(VDF-TrFE-CFE) (vol%) |
|----------|---------------------|---------------------------------------------|---------------------------------|------------------------|
| L-6%N-L  | 6                   | 2.4                                         |                                 | 33.3                   |
| L-8%N-L  | 8                   | 4.7                                         | 2.4                             | 49.5                   |
| L-10%N-L | 10                  | 7.2                                         |                                 | 60                     |
| L-12%N-L | 12                  | 9.4                                         |                                 | 66.2                   |

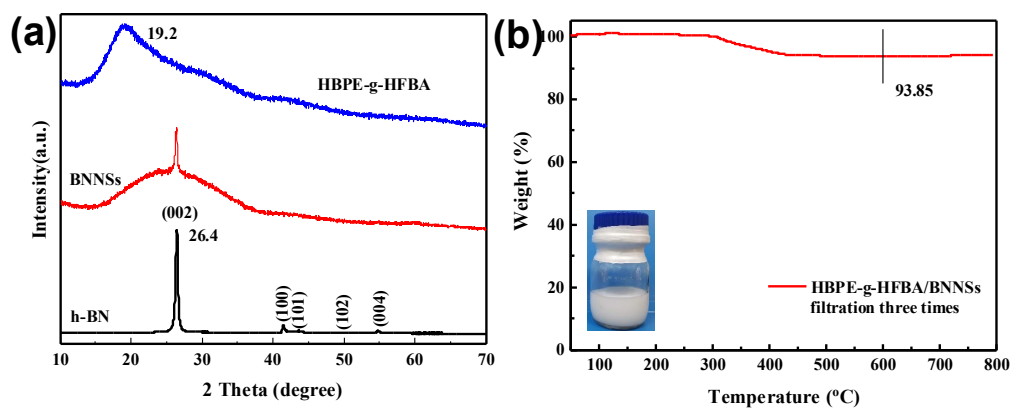

**Figure S3.** (a) XRD patterns, and (b) TGA curves of BNNs.

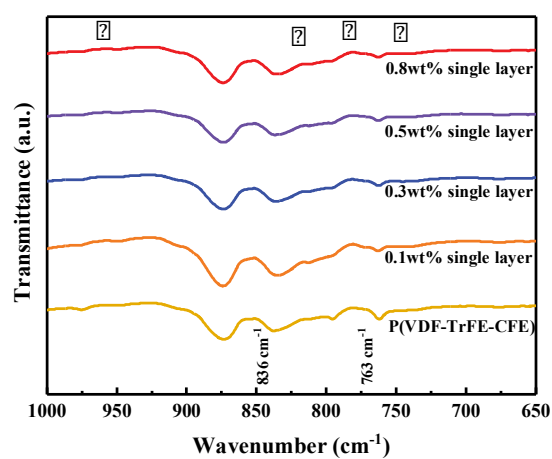

**Figure S4.** FTIR spectra of BNNs/P(VDF-TrFE-CFE) nanocomposite.

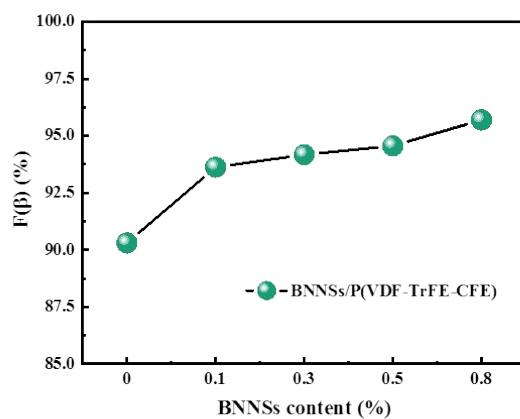

**Figure S5.** Relative content of  $\beta$ -phase in BNNs/P(VDF-TrFE-CFE) nanocomposite determined by FTIR spectroscopy.

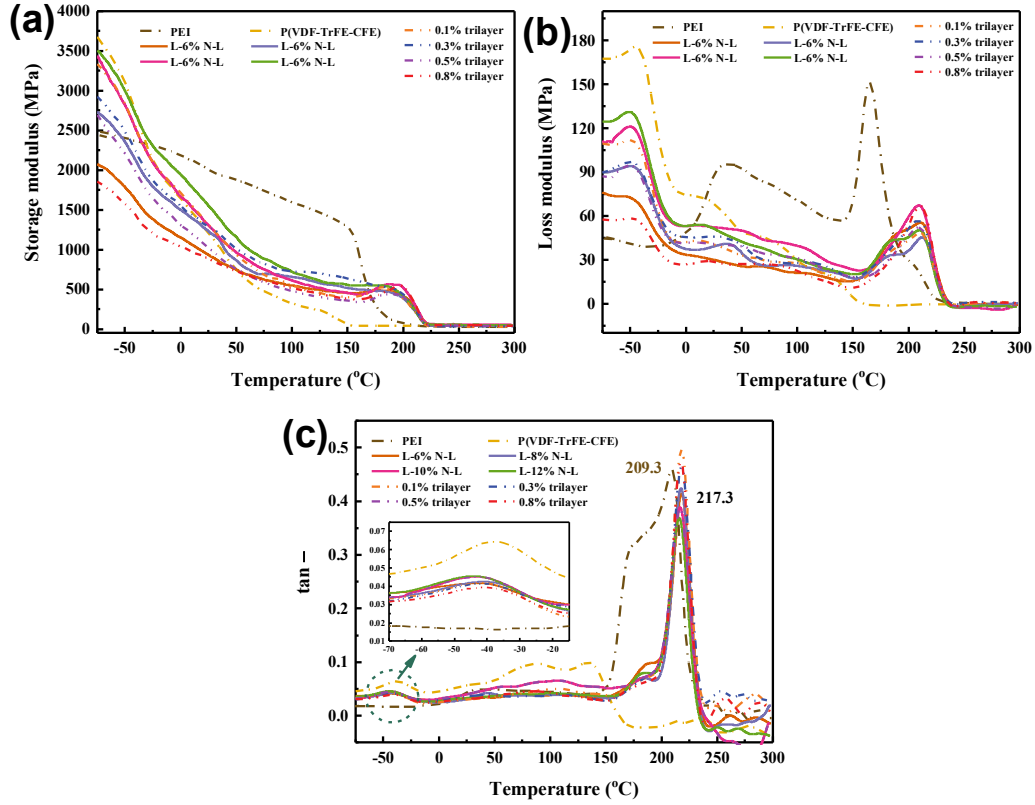

Figure S6. Dynamic thermomechanical analysis of composite (a) storage modulus, (b) loss modulus, and (c) loss factor.

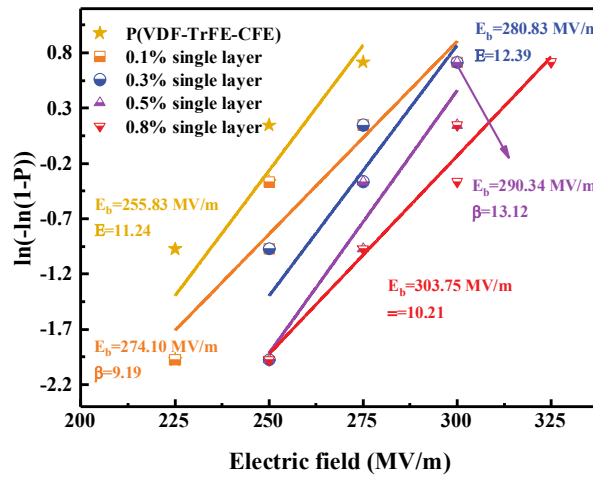

Figure S7. Two-parameter Weibull distribution plots of monolayer composite.

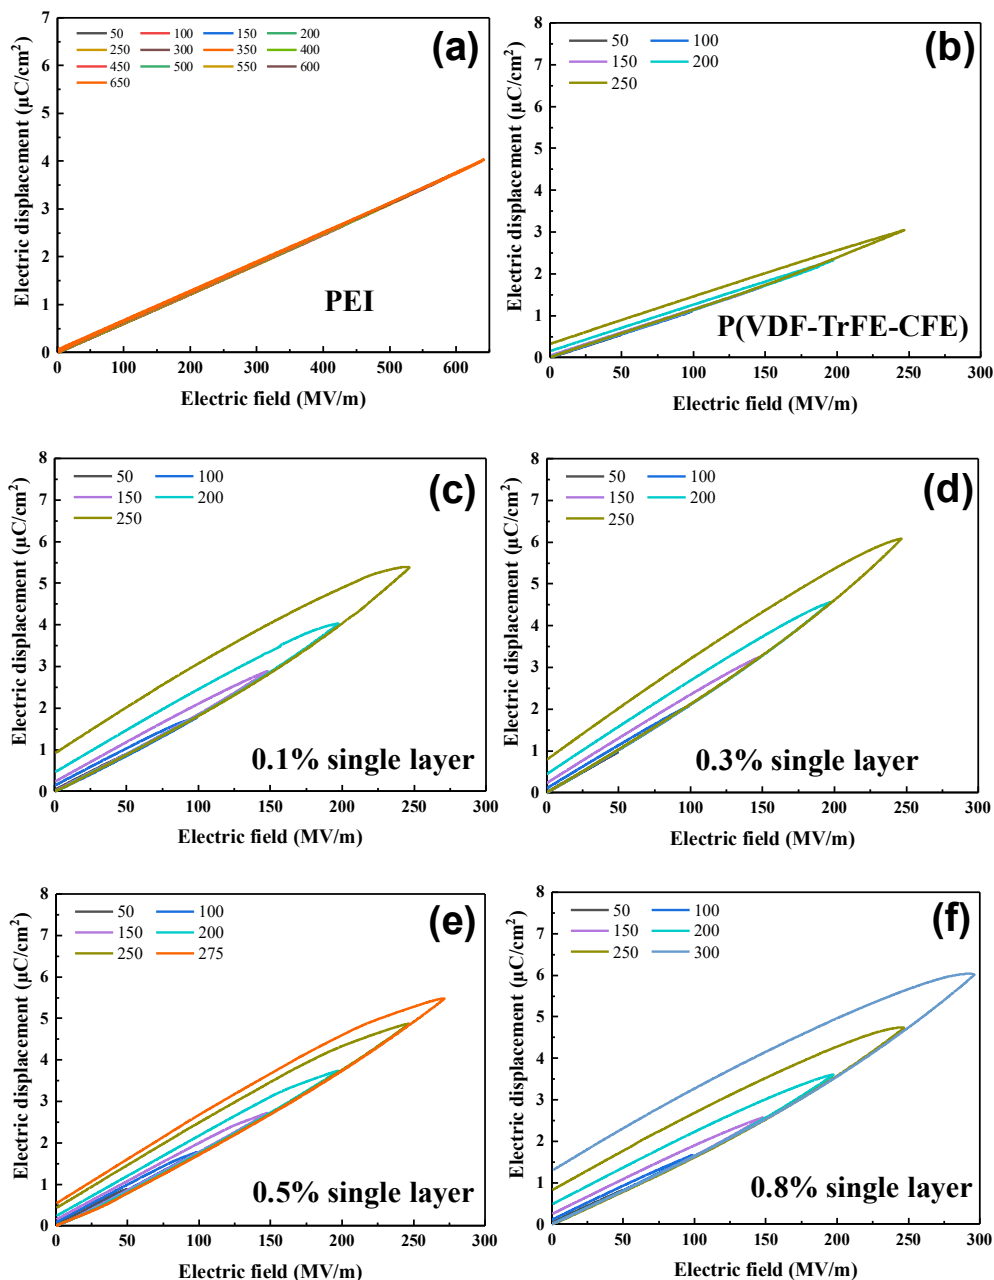

**Figure S8.** The unipolar P-E loops of monolayer films: (a) pure PEI, (b) pure P(VDF-TrFE-CFE), (c) 0.1% composite, (d) 0.3% composite, (e) 0.5% composite, and (f) 0.8% composite.

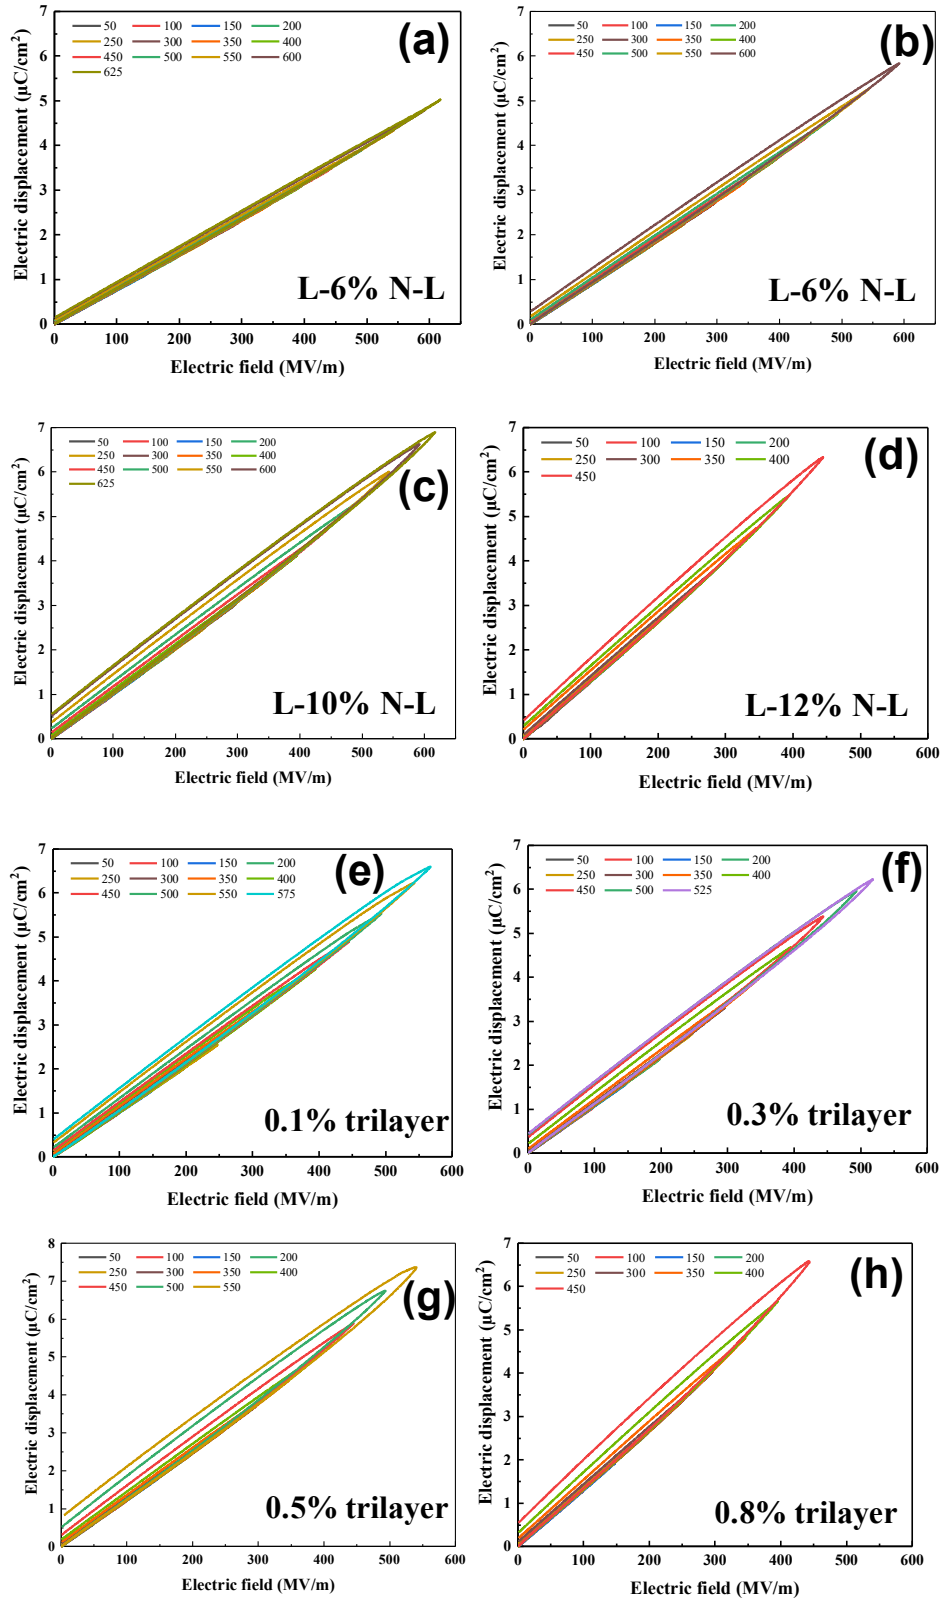

**Figure S9.** The P-E loops of all-polymer trilayer films: (a) L-6%N-L, (b) L-8%N-L, (c) L-10%N-L, (d) L-12%N-L. The P-E loops of BNNs/LNL films with different BNNs mass fractions: (e) 0.1%, (f) 0.3%, (g) 0.5%, and (h) 0.8%.

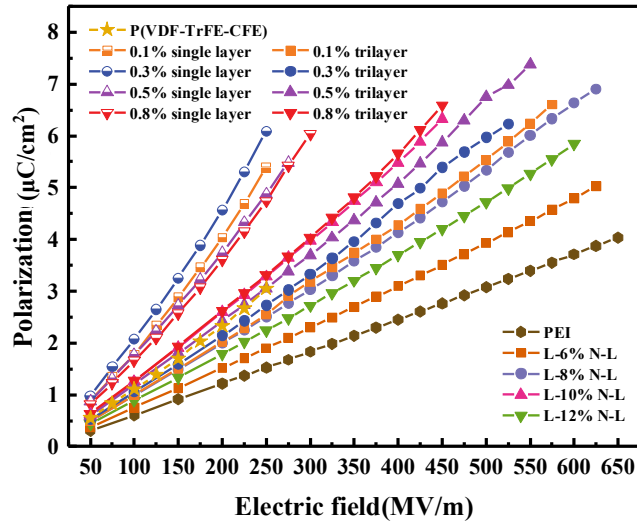

**Figure S10.** Maximum electrical displacements of pure PEI, pure P(VDF-TrFE-CFE), monolayer and trilayer composites.

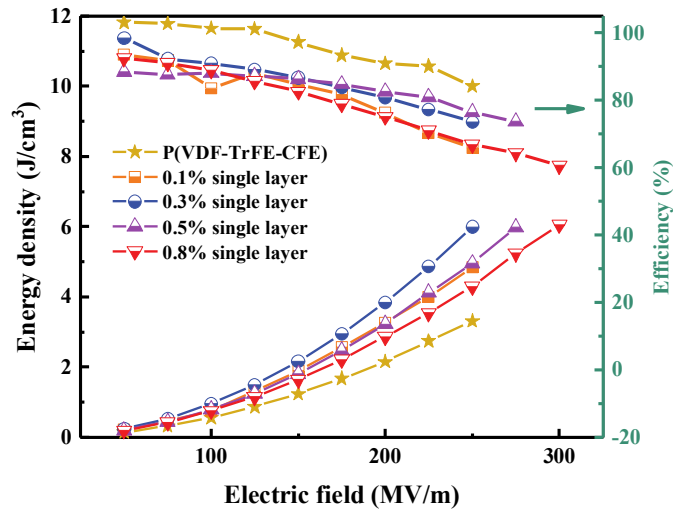

**Figure S11.** Energy density and charge-discharge efficiency of BNNSs/P(VDF-TrFE-CFE) composite.
